# Supplementary material for: Human Cerberus Prevents Nodal-Receptor Binding, Inhibits Nodal Signaling, and Suppresses Nodal-Mediated Phenotypes
Source: PubMed Central journal article supplement (PMC4300205; doi:10.1371/journal.pone.0114954), 2015-01-20

**Figure S4**

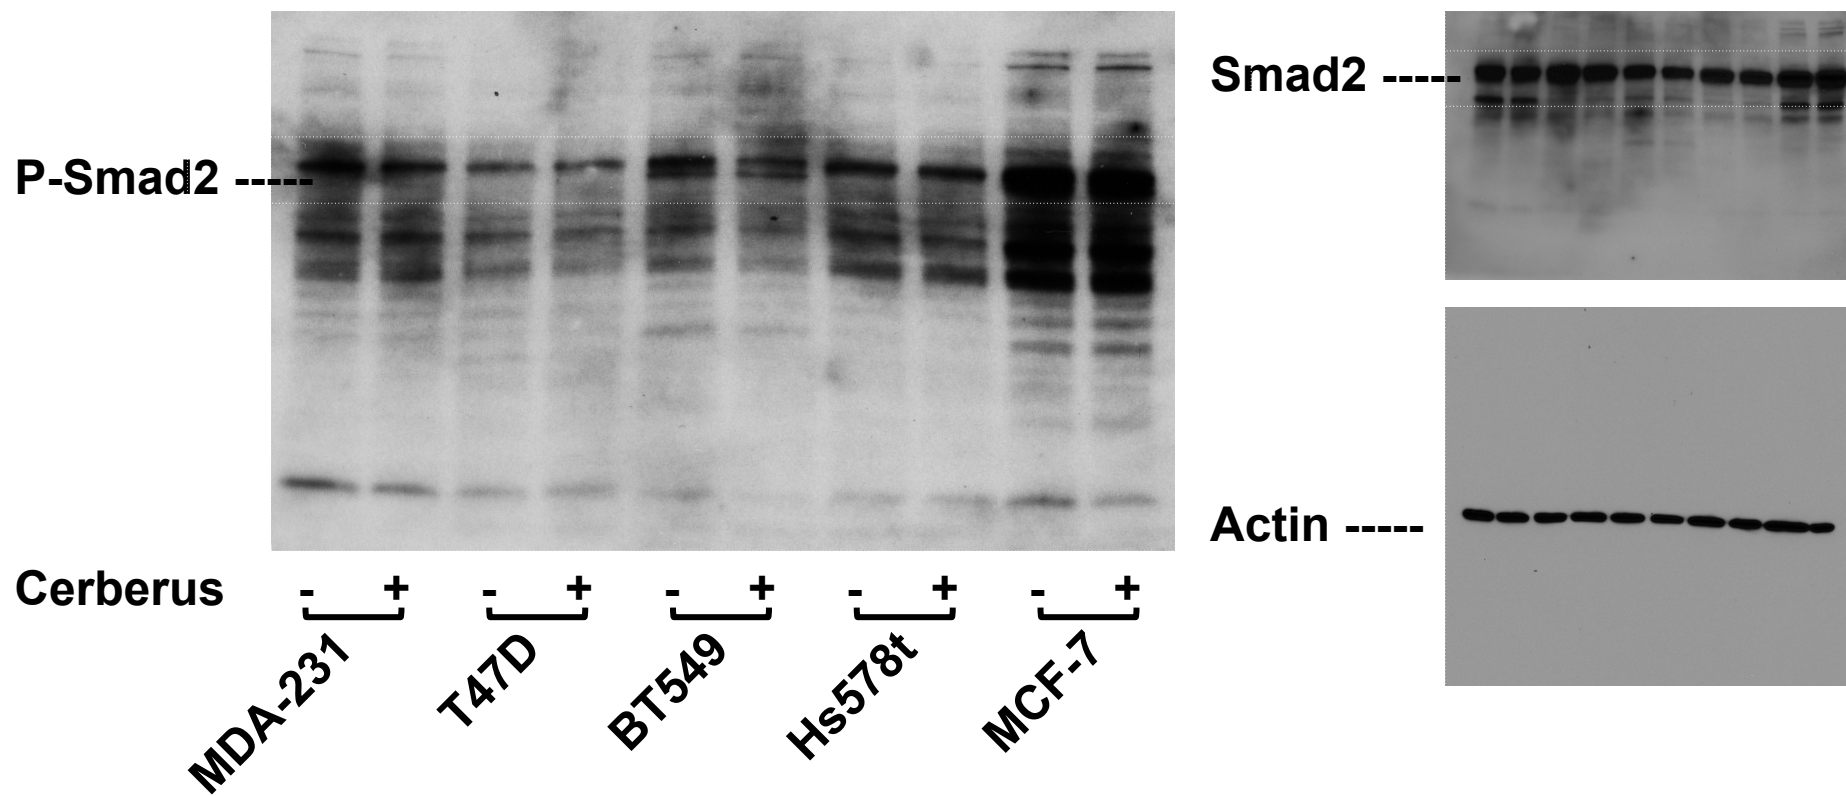

Supplement: pone.0114954.s004.pdf [file pone.0114954.s004.pdf]
