# Supplementary material for: Human Cerberus Prevents Nodal-Receptor Binding, Inhibits Nodal Signaling, and Suppresses Nodal-Mediated Phenotypes
Source: PubMed Central journal article supplement (PMC4300205; doi:10.1371/journal.pone.0114954), 2015-01-20
Supplement: pone.0114954.s006.pdf [file pone.0114954.s006.pdf]

**Table S1: Inhibition analysis, manuscript figure 4**

| Receptor | Inhibitor Concentration | $K_{d(\text{apparent})}$ (M) | $K_{d(\text{calculated})}$ (M)<br>Competitive Model |
|----------|-------------------------|------------------------------|-----------------------------------------------------|
| Cripto-1 | 40 nM                   | 2.58e <sup>-08</sup>         | 5.57e <sup>-08</sup>                                |
|          | 400 nM                  | N.D.                         | 5.43e <sup>-07</sup>                                |
| Alk4     | 40 nM                   | 1.83e <sup>-07</sup>         | 4.30e <sup>-07</sup>                                |
|          | 400 nM                  | N.D                          | 4.20e <sup>-06</sup>                                |
| ActRIIB  | 40 nM                   | 3.00e <sup>-07</sup>         | 5.60e <sup>-07</sup>                                |
|          | 400 nM                  | N.D.                         | 5.47e <sup>-06</sup>                                |
| BMPRII   | 40 nM                   | 3.85e <sup>-09</sup>         | 6.69e <sup>-09</sup>                                |
|          | 400 nM                  | 2.1e <sup>-08</sup>          | 6.52e <sup>-08</sup>                                |
|          | 4000 nM                 | 1.9e <sup>-08</sup>          | 6.50e <sup>-07</sup>                                |

Apparent  $K_d$  measured in the presence of the Cerberus ( $K_{d(\text{apparent})}$ ) approximately obeys the equation for competitive binding,  $K_{dapp} = K_d(1 + [\text{Cerberus}]/K_i)$  when comparing binding of Nodal to Cripto, ALK4 and ActRIIB with and without Cerberus. This is not the case for BMPRII.  $K_d$  is the dissociation binding constant of the Nodal-receptor interaction in the absence of Cerberus.  $K_i$  is the dissociation binding constant of the Nodal-Cerberus interaction.
